# Supplementary material
Source: PubMed Central journal article supplement (PMC3318482)
Supplement: supp_194.8.2020_TableS1-S2.pdf [file supp_194.8.2020_TableS1-S2.pdf]

TABLE S1. Oligonucleotides used in this study

---

**Construction of RcsB-His6**

agttccatggacaaccttaatgtaattattgctgatgacc  
agctaagcttcagttctttatccacttggc

**Construction of *malE-rcsA* fusion**

cgggatccatgaaaatattaatcaccgacgaatgc  
agctaagcttagaatggaatgtattgtgtcg

**Construction of RcsA-His6**

Tcgggatccctaatgatgatgatgatgatgatggtacaataacttaaacacattataatgaaacac  
Tcgggatccttattactgataaatcataaattatcgacacaatacattccattc

**Construction of *lacZ* deletion**

atgacgtcacaggaaaaggtaccactccaggtgcaactgagtccttgtaggctggagctgcttcg  
ttacacctgtattgccaacagatttggtactgataggttcacgcatatgaatatcctccttag

**Construction of *hmsT::lacZ* fusion**

gatttattagtctactgacagcacgatattatgcagagtaaattgcccgctgtttacaacgctc  
tcaaggggaagactgtacatttgataattcatcttagcaaatccgttaggctggagctgcttc

**Construction of *hmsP::lacZ* fusion**

atttgaagcccagatttcagcagcgcaccacgtaagtaatgacccaaatcattcccgcgtttacaacgctc  
tcttgctgacaagtgttttctaataatgtagggacttcacagccgttaggctggagctgcttc

**Construction of *hmsH::lacZ* fusion**

aacaagttgctggcttaagggtatataatgtataacgcattcccgcgtttacaacgctc  
gatttgataaaaattaatagcttcgccatggtccaattccctcgttaggctggagctgcttc

**Determination of *hmsT* transcription start site**

tgtcttgggcgacgatgatagc  
tggaattcgagtaagagagctgatgcttgcct  
tggaattcgttaaatagtttaacattatttaggattttc

**PCR amplification of *hmsT* promoter for EMSA**

tcatgatgacaggctgaaaca  
tccgacatcacgacaataaa

**RcsAB box mutagenesis**

ctaagagctcaaagtcattgctccgtacgc  
tgacgcatgcgagcagcaggacataatga  
cgtcagtactattttcttagccaaaattaccattttgtttcagcctgaaaataatgttaaaactatttaacaataataattccca  
atftttcttagccaaaattaccattttgtttcagcctg

**hmsT RT-PCR**

atcaggctctggtacggatttc

acgcaccacgatatctcttgaac

56-FAM/cacagcatcgcggaatggccg/36-TAMSp

---

All sequences are in 5'-3' orientation.

TABLE S2 The RcsAB box is present at the upstream of *hmsT* in all sequenced *Yersinia* spp.

| Strain                       | RcsAB box                        | Upstream of<br>ATG | NCBI accession # |
|------------------------------|----------------------------------|--------------------|------------------|
| Consensus sequence           | TaAGaatatTCcta                   | -                  | -                |
| <i>Y. pseudotuberculosis</i> | TaAGaaa <u>aa</u> TCcta          | 130-117 bp         | NC_006155        |
| <i>Y. pestis</i>             | TaAGaaa <u>aa</u> TCcta          | 130-117 bp         | NC_004088.1      |
| <i>Y. bercovieri</i>         | TaAGaaa <u>at</u> TCcta          | 132-119 bp         | NZ_AALC02000002  |
| <i>Y. mollaretii</i>         | TaAGaaa <u>at</u> TCcta          | 131-118 bp         | NZ_AALD02000031  |
| <i>Y. intermedia</i>         | TaAGaaa <u>at</u> TCcta          | 132-119 bp         | NZ_AALF02000024  |
| <i>Y. frederiksenii</i>      | TaAGaaa <u>at</u> TCcta          | 131-118 bp         | NZ_AALE02000024  |
| <i>Y. kristensenii</i>       | TaAGaaa <u>at</u> TCcta          | 132-119 bp         | NZ_ACCA01000004  |
| <i>Y. enterocolitica</i>     | TaAGaaa <u>at</u> TCcta          | 132-119 bp         | NC_008800        |
| <i>Y. aldovae</i>            | TaAGaaa <u>at</u> TC <u>ca</u>   | 131-118 bp         | NZ_ACCB01000013  |
| <i>Y. rohdei</i>             | Tag <u>G</u> aaa <u>aa</u> TCcta | 132-119 bp         | NZ_ACCD01000034  |
| <i>Y. ruckeri</i>            | TaAGaaa <u>aa</u> TC <u>ta</u>   | 127-104 bp         | NZ_ACCE01000053  |
